# Supplementary material for: Diet Supplementation with Fish-Derived Extracts Suppresses Diabetes and Modulates Intestinal Microbiome in a Murine Model of Diet-Induced Obesity
Source: MDPI journal article supplement (doi:10.3390/md19050268), 2021-05-11
Supplement: s1 [file s1]

Supplementary Material for

# Diet supplementation with fish-derived extracts suppresses diabetes and modulates intestinal microbiome in a murine model of high-fat induced obesity

Konstantinos Axarlis<sup>1,2</sup>, Maria G. Daskalaki<sup>1,2</sup>, Sofia Michailidou<sup>3</sup>, Nikolais Androulaki<sup>1</sup>, Antiopi Tsourekis<sup>3</sup>, Evangelia Mouchtaropoulou<sup>3</sup>, Ourania Kolliniati<sup>1,2</sup>, Ioanna Lapi<sup>1,2</sup>, Eirini Dermitzaki<sup>1,2</sup>, Maria Venihaki<sup>1</sup>, Katerina Kousoulaki<sup>4</sup>, Anagnostis Argiriou<sup>3,5</sup>, Zouhir El Marsni<sup>6,\*</sup> and Christos Tsatsanis<sup>2,\*</sup>

<sup>1</sup> Laboratory of Clinical Chemistry, Medical School, University of Crete, Heraklion 70013, Greece; mol-grad392@edu.biology.uoc.gr (KA); m.daskalaki@med.uoc.gr (MGD); nikolandroulaki@gmail.com (NA); raliakolliniatis21@gmail.com (OK); iwanna\_lapi@hotmail.com (IL); renaderm@med.uoc.gr (ED); venihaki@med.uoc.gr (MV)

<sup>2</sup> Institute of Molecular Biology and Biotechnology, FORTH, 71100 Heraklion, Greece;

<sup>3</sup> Institute of Applied Biosciences (INAB), CERTH, Thessaloniki GR-57001, Greece; sofia\_micha28@certh.gr (SM), adatsourekis@certh.gr (AT); eva.mouchtaropoulou@certh.gr (EM), argiriou@certh.gr (AA)

<sup>4</sup> Department of Nutrition and Feed Technology, Nofima AS, 5141 Bergen, Norway; katerina.kousoulaki@nofima.no (KK)

<sup>5</sup> Department of Food Science and Nutrition, University of the Aegean, Myrina, 81400, Lemnos, Greece;

<sup>6</sup> Seagarden AS, 4262 Avaldsnes, Norway;

\* Correspondence: tsatsani@med.uoc.gr, Tel.: +30-2810394833 (CT); zouhir.el.marsni@seagarden.no, Tel.: +4752859482 (ZEM)

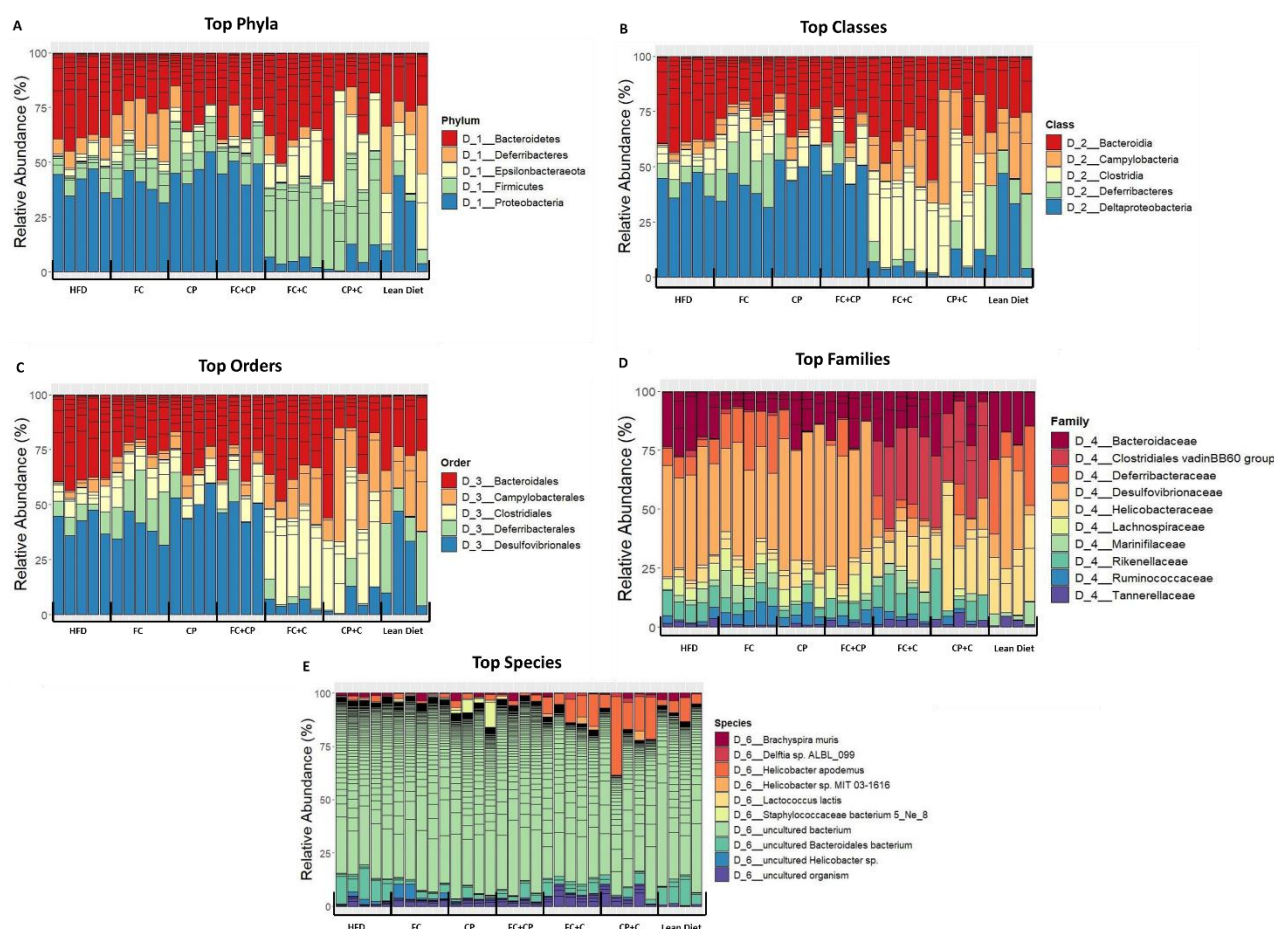

**Figure S1.** The effect of fish-derived dietary supplements on the intestinal microbiome composition of top A. phyla, B. classes, C. orders, D. families and E. species. Top genera are depicted in the main paper.

**Table S1.** Nutritional composition of supplemented diets given to each diet group.

| Chemical composition | Unit<br>(per 100g of supplemented food) | Diet Groups |         |        |        |        |        |        |
|----------------------|-----------------------------------------|-------------|---------|--------|--------|--------|--------|--------|
|                      |                                         | S (ND)      | S (HFD) | FC     | CP     | FC+CP  | FC+C   | CP+C   |
| Energy               | <i>Kcal</i>                             | 272.4       | 537.8   | 538.0  | 534.0  | 536.0  | 538.1  | 536.1  |
|                      | <i>KJ</i>                               | 1138.8      | 2253.3  | 2254.8 | 2237.5 | 2246.1 | 2255.1 | 2246.5 |
| Carbohydrates        | <i>g</i>                                | 44.0        | 24.6    | 24.6   | 24.6   | 24.6   | 24.6   | 24.6   |
| Protein              | <i>g</i>                                | 22.3        | 35.2    | 34.8   | 33.8   | 34.3   | 35.0   | 34.5   |
| Fat                  | <i>g</i>                                | 2.9         | 33.2    | 33.4   | 33.4   | 33.4   | 33.3   | 33.3   |

**Table S2.** Summary of top genera found in the intestinal microbiome of high-fat induced obese mice and their role in inflammation and obesity.

| Phylum          | Genus                                | Role                                                                                   | Reference |
|-----------------|--------------------------------------|----------------------------------------------------------------------------------------|-----------|
| Bacteroidetes   | <i>Bacteroides</i>                   | Decreased during IBD, protect against pathogenic microorganism intestinal colonization | [1-3]     |
|                 | <i>Alistipes</i>                     | Found in healthy individuals, protection against colitis                               | [4]       |
|                 | <i>Odoribacter</i>                   | Short-chain fatty acid (SCFAs) producers                                               | [5]       |
| Firmicutes      | <i>Lachnospiraceae NK4A136 group</i> | Butyrate producers, SCFAs                                                              | [6,7]     |
|                 | <i>Ruminiclostridium 9</i>           | Butyrate producers, SCFAs                                                              | [8]       |
|                 | <i>Ruminiclostridium</i>             | Acetate producers, SCFAs                                                               | [9]       |
| Deferribacteres | <i>Mucispirillum</i>                 | Increased during intestinal inflammation                                               | [10]      |
| Proteobacteria  | <i>Helicobacter</i>                  | Induction of inflammation mainly by <i>H.pylori</i>                                    | [11,12]   |

## References for Supplementary information

- Wexler, H.M. *Bacteroides*: the good, the bad, and the nitty-gritty. *Clinical microbiology reviews* **2007**, *20*, 593-621, doi:10.1128/CMR.00008-07.
- Zhou, Y.; Zhi, F. Lower Level of *Bacteroides* in the Gut Microbiota Is Associated with Inflammatory Bowel Disease: A Meta-Analysis. *BioMed Research International* **2016**, *2016*, 5828959, doi:10.1155/2016/5828959.
- Charlet, R.; Bortolus, C.; Sendid, B.; Jawhara, S. *Bacteroides thetaiotaomicron* and *Lactobacillus johnsonii* modulate intestinal inflammation and eliminate fungi via enzymatic hydrolysis of the fungal cell wall. *Scientific Reports* **2020**, *10*, 11510, doi:10.1038/s41598-020-68214-9.
- Parker, B.J.; Wearsch, P.A.; Veloo, A.C.M.; Rodriguez-Palacios, A. The Genus *Alistipes*: Gut Bacteria With Emerging Implications to Inflammation, Cancer, and Mental Health. **2020**, *11*, doi:10.3389/fimmu.2020.00906.
- Göker, M.; Gronow, S.; Zeytun, A.; Nolan, M.; Lucas, S.; Lapidus, A.; Hammon, N.; Deshpande, S.; Cheng, J.-F.; Pitluck, S., et al. Complete genome sequence of *Odoribacter splanchnicus* type strain (1651/6). *Stand Genomic Sci* **2011**, *4*, 200-209, doi:10.4056/sigs.1714269.
- Stadlbauer, V.; Engertsberger, L.; Komarova, I.; Feldbacher, N.; Leber, B.; Pichler, G.; Fink, N.; Scarpatti, M.; Schipfinger, W.; Schmidt, R., et al. Dysbiosis, gut barrier dysfunction and inflammation in dementia: a pilot study. *BMC Geriatrics* **2020**, *20*, 248, doi:10.1186/s12877-020-01644-2.
- Hu, S.; Wang, J.; Xu, Y.; Yang, H.; Wang, J.; Xue, C.; Yan, X.; Su, L. Anti-inflammation effects of fucosylated chondroitin sulphate from *Acaudina molpadioides* by altering gut microbiota in obese mice. *Food & function* **2019**, *10*, 1736-1746, doi:10.1039/C8FO02364F.
- Cherbuy, C.; Bellet, D.; Robert, V.; Mayeur, C.; Schwiertz, A.; Langella, P. Modulation of the Caecal Gut Microbiota of Mice by Dietary Supplement Containing Resistant Starch: Impact Is Donor-Dependent. *Frontiers in microbiology* **2019**, *10*, 1234-1234, doi:10.3389/fmicb.2019.01234.
- Yamamura, R.; Nakamura, K.; Kitada, N.; Aizawa, T.; Shimizu, Y.; Nakamura, K.; Ayabe, T.; Kimura, T.; Tamakoshi, A. Associations of gut microbiota, dietary intake, and serum short-chain fatty acids with fecal short-chain fatty acids. *Biosci Microbiota Food Health* **2020**, *39*, 11-17, doi:10.12938/bmfh.19-010.

- 
10. Berry, D.; Kuzyk, O.; Rauch, I.; Heider, S.; Schwab, C.; Hainzl, E.; Decker, T.; Müller, M.; Strobl, B.; Schleper, C., et al. Intestinal Microbiota Signatures Associated with Inflammation History in Mice Experiencing Recurring Colitis. *Frontiers in microbiology* **2015**, *6*, 1408, doi:10.3389/fmicb.2015.01408.
  11. Malfertheiner, P.; Link, A.; Selgrad, M. *Helicobacter pylori*: perspectives and time trends. *Nature Reviews Gastroenterology & Hepatology* **2014**, *11*, 628–638, doi:10.1038/nrgastro.2014.99.
  12. Ménard, A.; Smet, A. Review: Other *Helicobacter* species. *Helicobacter* **2019**, *24 Suppl 1*, e12645, doi:10.1111/hel.12645.
